# Supplementary material for: Rapid micro-assays for amylolytic activities determination: customization and validation of the tests
Source: PubMed Central journal article supplement (PMC6420461; doi:10.1007/s00253-018-09610-0), 2019-01-23

Applied Microbiology and Biotechnology

*Rapid micro-assays for amylolytic activities determination: customization and validation of the tests*

Monika Borkowska, Wojciech Białas, Monika Kubiak, Ewelina Celińska\*

Department of Biotechnology and Food Microbiology, Poznan University of Life Sciences, ul. Wojska  
Polskiego 48, 60-627 Poznań, Poland

\*corresponding author: E. Celińska: [ewelina.celinska@up.poznan.pl](mailto:ewelina.celinska@up.poznan.pl), +48 61 846 6007

## Supplementary Material

**Table S1. Selected details of statistical analysis of the obtained results**

### 1. Results presented in Fig.1.b.c.e.f

Standard curves for microSIT, macroSIT, microSNT, macroSNT – statistical analysis of matching the experimental data with the regression model

| ANOVA microSIT |    |          |          |          |          |
|----------------|----|----------|----------|----------|----------|
|                | df | SS       | MS       | F        | p value  |
| Model          | 1  | 6,861872 | 6,861872 | 138,0183 | 1,39E-09 |
| Error          | 6  | 0,845191 | 0,049717 |          |          |
| Total          | 7  | 7,707063 |          |          |          |

| ANOVA macroSIT |    |          |          |          |          |
|----------------|----|----------|----------|----------|----------|
|                | df | SS       | MS       | F        | p value  |
| Model          | 1  | 0,558831 | 0,558831 | 70,79859 | 1,82E-07 |
| Error          | 6  | 0,134185 | 0,007893 |          |          |
| Total          | 7  | 0,693016 |          |          |          |

| ANOVA microSNT |    |             |             |             |             |
|----------------|----|-------------|-------------|-------------|-------------|
|                | df | SS          | MS          | F           | p value     |
| Model          | 1  | 0,686835299 | 0,686835299 | 1889,202778 | 7,23521E-19 |
| Error          | 6  | 0,006180491 | 0,000363558 |             |             |
| Total          | 7  | 0,693015789 |             |             |             |

| ANOVA macroSNT |    |             |             |             |             |
|----------------|----|-------------|-------------|-------------|-------------|
|                | df | SS          | MS          | F           | p value     |
| Model          | 1  | 0,689251608 | 0,689251608 | 3112,835558 | 1,06727E-20 |
| Error          | 6  | 0,003764181 | 0,000221422 |             |             |
| Total          | 7  | 0,693015789 |             |             |             |

### 2. Results presented in Fig. 2 (a) heating time optimization for microSNT

HSD (honestly significant difference) Tukey test; p value = 0.05

1 – grouping

| Nr podkl. | Time [min] | Absorbance [600nm]<br>Średnie | 1    | 2    | 3    | 4    | 5    |
|-----------|------------|-------------------------------|------|------|------|------|------|
| 9         | 10         | 0.261350                      |      |      |      | **** |      |
| 1         | 1          | 0.541050                      |      |      |      |      | **** |
| 8         | 8          | 0.621750                      |      |      | **** |      |      |
| 2         | 2          | 0.693350                      |      |      | **** |      |      |
| 3         | 3          | 0.771900                      |      | **** |      |      |      |
| 7         | 7          | 0.814325                      | **** | **** |      |      |      |
| 4         | 4          | 0.819975                      | **** | **** |      |      |      |
| 6         | 6          | 0.849050                      | **** |      |      |      |      |
| 5         | 5          | 0.870850                      | **** |      |      |      |      |

2 – statistical important differences (results not statistically different are given in black)

| Nr podkl. | Time [min] | {1}      | {2}      | {3}      | {4}      | {5}      | {6}      | {7}      | {8}      | {9}      |
|-----------|------------|----------|----------|----------|----------|----------|----------|----------|----------|----------|
| 1         | 1          | .54105   | .69335   | .77190   | .81998   | .87085   | .84905   | .81433   | .62175   | .26135   |
| 2         | 2          | 0.000153 | 0.000153 | 0.000151 | 0.000151 | 0.000151 | 0.000151 | 0.000151 | 0.018865 | 0.000151 |
| 3         | 3          | 0.000151 | 0.023955 |          | 0.401147 | 0.002322 | 0.027947 | 0.562152 | 0.000154 | 0.000151 |
| 4         | 4          | 0.000151 | 0.000211 | 0.401147 |          | 0.330188 | 0.901452 | 0.999999 | 0.000151 | 0.000151 |
| 5         | 5          | 0.000151 | 0.000152 | 0.002322 | 0.330188 |          | 0.980096 | 0.212162 | 0.000151 | 0.000151 |
| 6         | 6          | 0.000151 | 0.000152 | 0.027947 | 0.901452 | 0.980096 |          | 0.780979 | 0.000151 | 0.000151 |
| 7         | 7          | 0.000151 | 0.000284 | 0.562152 | 0.999999 | 0.212162 | 0.780979 |          | 0.000151 | 0.000151 |
| 8         | 8          | 0.018865 | 0.050674 | 0.000154 | 0.000151 | 0.000151 | 0.000151 | 0.000151 |          | 0.000151 |
| 9         | 10         | 0.000151 | 0.000151 | 0.000151 | 0.000151 | 0.000151 | 0.000151 | 0.000151 | 0.000151 |          |

### 3. Results presented in Fig. 2 (b) heating temperature optimization for microSNT

HSD (honestly significant difference) Tukey test; p value = 0.05

1 – grouping

| Nr podkl. | Temperature [C] | Absorbance [600nm]<br>Średnie | 1    | 2    | 3    | 4    | 5    |
|-----------|-----------------|-------------------------------|------|------|------|------|------|
| 1         | 75              | 0.010500                      | **** |      |      |      |      |
| 2         | 80              | 0.030467                      | **** |      |      |      |      |
| 3         | 85              | 0.127133                      |      | **** |      |      |      |
| 4         | 90              | 0.271833                      |      |      | **** |      |      |
| 5         | 95              | 0.388233                      |      |      |      | **** |      |
| 6         | 100             | 0.466933                      |      |      |      |      | **** |

2 - statistical important differences (results not statistically different are given in black)

| Nr podkl. | Temperature [C] | {1}      | {2}      | {3}      | {4}      | {5}      | {6}      |
|-----------|-----------------|----------|----------|----------|----------|----------|----------|
| 1         | 75              | .01050   | .03047   | .12713   | .27183   | .38823   | .46693   |
| 2         | 80              | 0.927261 |          | 0.001555 | 0.000159 | 0.000159 | 0.000159 |
| 3         | 85              | 0.927261 |          | 0.006663 | 0.000159 | 0.000159 | 0.000159 |
| 4         | 90              | 0.001555 | 0.006663 |          | 0.000335 | 0.000159 | 0.000159 |
| 5         | 95              | 0.000159 | 0.000159 | 0.000335 |          | 0.001580 | 0.000162 |
| 6         | 100             | 0.000159 | 0.000159 | 0.000159 | 0.001580 | 0.027434 |          |

### 4. Results presented in Fig.3. – reagents volume

| ANOVA |       | DF | Sum of Squares | Mean Square | F Value  | p value  | Adj R2  |
|-------|-------|----|----------------|-------------|----------|----------|---------|
| 10ul  | Model | 1  | 0,12619        | 0,12619     | 21,89423 | 0,00544  | 0,7769  |
|       | Error | 5  | 0,02882        | 0,00576     |          |          |         |
|       | Total | 6  | 0,15501        |             |          |          |         |
| 20ul  | Model | 1  | 1,05883        | 1,05883     | 47,85969 | 9,68E-04 | 0,88649 |
|       | Error | 5  | 0,11062        | 0,02212     |          |          |         |
|       | Total | 6  | 1,16945        |             |          |          |         |
| 30ul  | Model | 1  | 1,68671        | 1,68671     | 116,1122 | 1,19E-04 | 0,95046 |
|       | Error | 5  | 0,07263        | 0,01453     |          |          |         |
|       | Total | 6  | 1,75935        |             |          |          |         |
| 40ul  | Model | 1  | 4,91244        | 4,91244     | 326,8317 | 9,51E-06 | 0,98192 |
|       | Error | 5  | 0,07515        | 0,01503     |          |          |         |
|       | Total | 6  | 4,98759        |             |          |          |         |

**Figure S1.** Diagrams representing protocols under study: macroSIT, macroSNT, microSIT, microSNT. Detailed description of the protocols is provided in the main text of the article

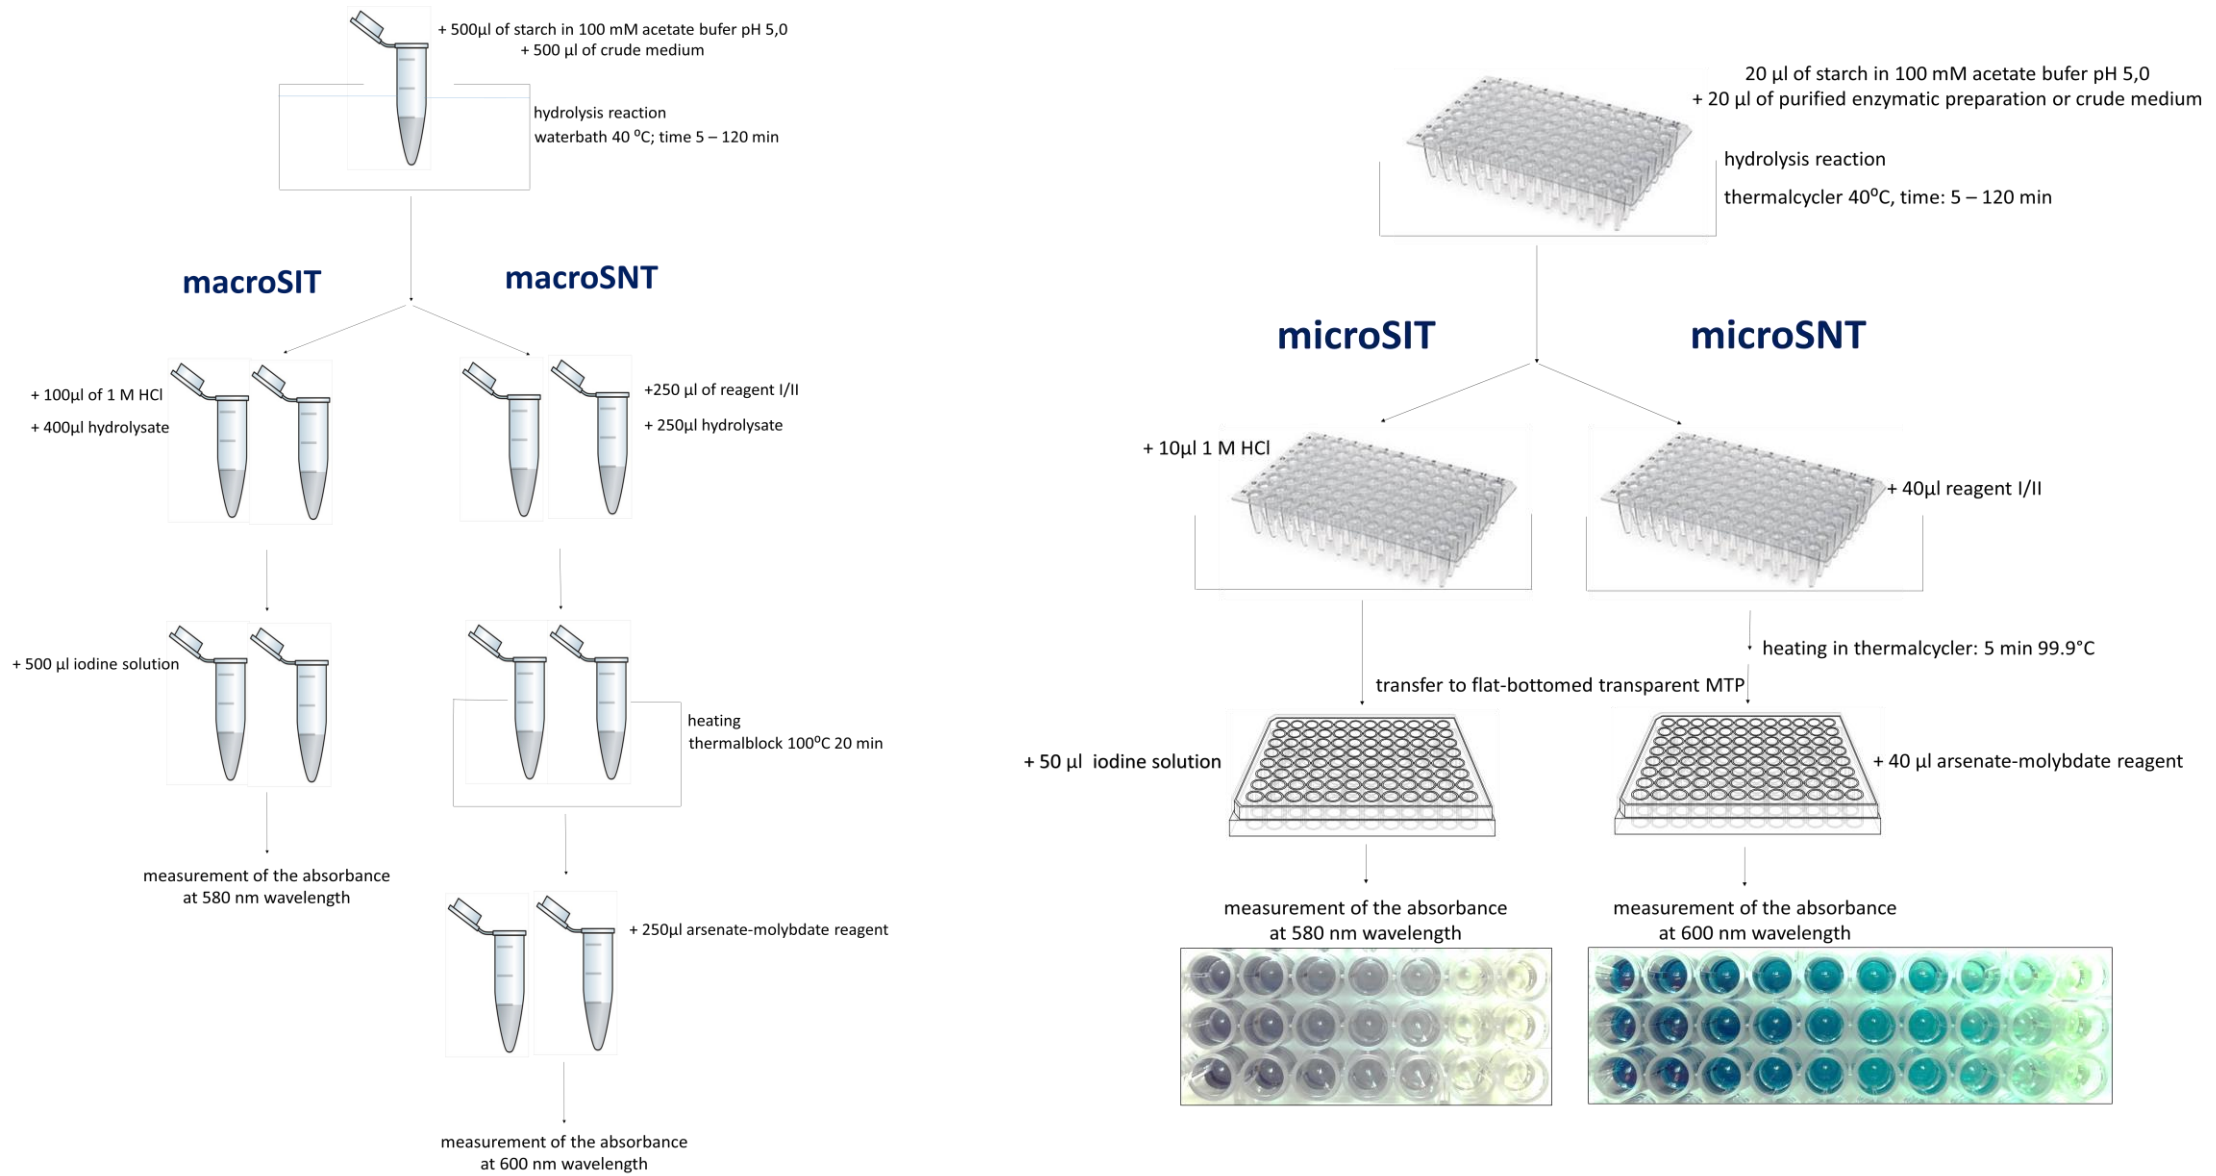

Supplement: 253_2018_9610_MOESM1_ESM.pdf [file 253_2018_9610_MOESM1_ESM.pdf]
